# Supplementary material
Source: PubMed Central journal article supplement (PMC6394857)
Supplement: NIHMS1517683-supplement-1.pdf [file NIHMS1517683-supplement-1.pdf]

A.

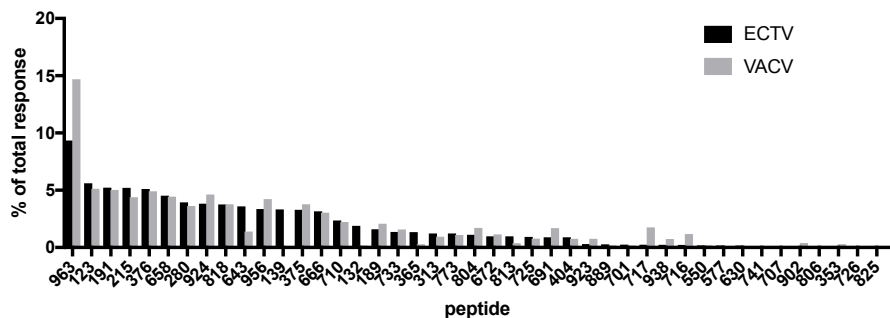

B.

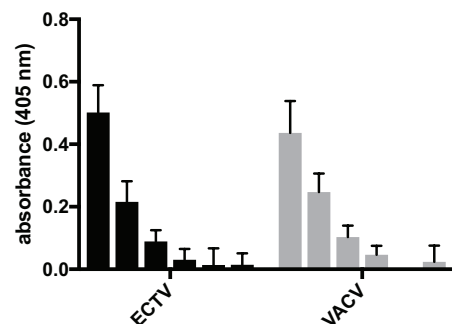

Figure S1. Analysis of peptide cross-reactivity to vaccinia virus (VACV). A. 3 Female C57Bl/6 mice were infected with either  $3 \times 10^3$  pfu ECTV via footpad injection or  $1 \times 10^5$  pfu VAVC via i.p. injection. 10 days later spleens in each group were pooled and CD4<sup>+</sup> T cells were isolated by negative bead selection and mixed with peptide-pulsed BMDCs and analyzed for IFN $\gamma$  production by ELISpot. Representative of 2 independent experiments. Peptides counts for each group were normalized to the total number of spots. B. Serum collected from each mouse in the two independent experiments in A was analyzed for levels of virus-specific IgG antibodies, with the capture virus matching the infection virus, by ELISA and background subtracted from pooled naïve serum.

Supplemental Table 1- Analysis of consistent epitope hits

| Protein title | Peptide # | % response | predicted strength | Peptide Sequence | Kinetics <sup>1</sup> | Function <sup>1</sup> | GI#      | Accession#  |
|---------------|-----------|------------|--------------------|------------------|-----------------------|-----------------------|----------|-------------|
| EVM001        | 123       | 2.54       | 11.65              | PMYGIESPATHEEA   | E                     | virulence             | 22164608 | NP_671519.1 |
| EVM003        | 132       | 3.84       | 16.42              | TFTSIPNHSPACLSC  | N/A                   | N/A                   | 22164610 | NP_671521.1 |
| EVM004        | 139       | 3.79       | 17.01              | NIDYSGFVIETADF   | E                     | regulation            | 22164611 | NP_671522.1 |
| EVM017        | 189       | 2.94       | 12.71              | PPTCQIVKCPHPTIS  | IE                    | unknown               | 22164624 | NP_671535.1 |
| EVM017        | 191       | 0.64       | 4.78               | YKLSGSSSSTCSPEN  | IE                    | unknown               | 22164624 | NP_671535.1 |
| EVM025        | 215       | 0.34       | 14.40              | YITDIFSTPRDNATT  | IE                    | virulence             | 22164630 | NP_671543.1 |
| EVM038        | 280       | 0.87       | 2.43               | DTPRYIPSTSISSN   | E                     | unknown               | 22164643 | NP_671556.1 |
| EVM044        | 313       | 3.22       | 5.14               | LDEKYNTPCPNCKSR  | E/L                   | unknown               | 22164649 | NP_671562.1 |
| EVM049        | 365       | 2.84       | 3.78               | ERYFYAYICPANEPW  | N/A                   | unknown               | 22164654 | NP_671567.1 |
| EVM049        | 353       | 0.56       | 1.67               | SMVFEYRASTVIKGP  | N/A                   | unknown               | 22164654 | NP_671567.1 |
| EVM054        | 376       | 0.56       | 4.82               | RALKAYFTAKINEMV  | IE                    | unknown               | 22164659 | NP_671572.1 |
| EVM054        | 375       | 0.28       | 2.21               | DQLIFNSISARALKA  | IE                    | unknown               | 22164659 | NP_671572.1 |
| EVM057        | 404       | 0.88       | 13.94              | GEFQVVNPHLLRVLTL | IE                    | unknown               | 22164662 | NP_671575.1 |
| EVM082        | 550       | 2.26       | 15.30              | NLSYITSGKNNMIRS  | E                     | regulation            | 22164687 | NP_671600.1 |
| EVM084        | 577       | 0.52       | 11.36              | MLNELGYSGYFMSPH  | E                     | regulation            | 22164689 | NP_671602.1 |
| EVM090        | 630       | 0.54       | 1.17               | DRILVYNPSTMSTPM  | E/L                   | unknown               | 22164695 | NP_671608.1 |
| EVM094        | 643       | 2.22       | 8.57               | GAIRIYKTGNPHSCK  | L                     | structural            | 22164699 | NP_671612.1 |
| EVM095        | 658       | 5.22       | 9.87               | SEYNGSQGTNPHEMIN | E                     | regulation            | 22164700 | NP_671613.1 |
| EVM097        | 672       | 4.89       | 2.59               | YFTYLGTTINHSADA  | E                     | regulation            | 22164702 | NP_671615.1 |
| EVM097        | 666       | 2.55       | 2.34               | IHYNESKPTTIQNTG  | E                     | regulation            | 22164702 | NP_671615.1 |
| EVM101        | 691       | 3.13       | 14.21              | NLSLGKSPPLSLEYG  | IE                    | regulation            | 22164706 | NP_671619.1 |
| EVM102        | 701       | 1.13       | 2.54               | FFRPTTITANVSRGK  | L                     | regulation            | 22164707 | NP_671620.1 |
| EVM106        | 710       | 4.03       | 5.49               | SQDLSFIYRKPETNY  | L                     | regulation            | 22164711 | NP_671624.1 |
| EVM106        | 716       | 3.23       | 1.34               | GNSGRVVFAPPNIGY  | L                     | regulation            | 22164711 | NP_671624.1 |
| EVM106        | 707       | 1.09       | 10.55              | QIVDDDFISAGARNQ  | L                     | regulation            | 22164711 | NP_671624.1 |
| EVM106        | 717       | 0.33       | 8.46               | VVFAPPNIGYGRCSG  | L                     | regulation            | 22164711 | NP_671624.1 |
| EVM107        | 733       | 2.52       | 10.29              | DGSISCTTPTVTPPQ  | L                     | structural            | 22164712 | NP_671625.1 |
| EVM107        | 726       | 1.83       | 5.61               | IHITPQPVPTSTPSA  | L                     | structural            | 22164712 | NP_671625.1 |
| EVM107        | 725       | 1.49       | 10.70              | PLQPTIHITPQPVPT  | L                     | structural            | 22164712 | NP_671625.1 |
| EVM109        | 741       | 2.51       | 13.91              | TLNEYKQLYTISSSES | E/L                   | structural            | 22164714 | NP_671627.1 |
| EVM114        | 773       | 2.88       | 12.15              | EKRFNITVSKNAEAI  | IE                    | regulation            | 22164719 | NP_671632.1 |
| EVM121        | 804       | 3.04       | 14.20              | ANRIYCNSIINIACL  | L                     | unknown               | 22164727 | NP_671640.1 |
| EVM121        | 806       | 0.60       | 1.58               | LDRTVYVFPSTSIKE  | L                     | unknown               | 22164727 | NP_671640.1 |
| EVM124        | 813       | 1.99       | 6.99               | NIFIPSVITKSGKKI  | E                     | regulation            | 22164730 | NP_671643.1 |
| EVM126        | 818       | 1.69       | 11.17              | DEYLSTTVRSNINQP  | L                     | structural            | 22164732 | NP_671645.1 |
| EVM127        | 825       | 2.24       | 0.72               | NSFTFSFSSVSPPNV  | E                     | regulation            | 22164733 | NP_671646.1 |
| EVM139        | 889       | 2.71       | 5.32               | YAPYQNSKVTIISHN  | L                     | structural            | 22164745 | NP_671658.1 |
| EVM141        | 902       | 0.96       | 0.62               | LTGYAPVSPIVIART  | IE                    | unknown               | 22164747 | NP_671660.1 |
| EVM147        | 924       | 1.36       | 2.90               | RYAFSGVAYAAAKGA  | L                     | structural            | 22164753 | NP_671666.1 |
| EVM147        | 923       | 0.51       | 2.81               | TLIVDRYAFSGVAYAY | L                     | structural            | 22164753 | NP_671666.1 |
| EVM149        | 938       | 1.95       | 1.67               | TGVYNYFKPKDAIPV  | L                     | structural            | 22164755 | NP_671668.1 |
| EVM151        | 956       | 0.64       | 0.87               | SVFEIATPEPITDKE  | IE                    | unknown               | 22164757 | NP_671670.1 |
| EVM153        | 963       | 7.43       | 2.23               | VKNKYMWCYSQVKNR  | E                     | regulation            | 22164759 | NP_671672.1 |

<sup>1</sup> as assessed for VACV in [39]

## Supplemental Table 2- Analysis of sporadic epitope hits

| Protein title | Peptide # | predicted strength | kinetics <sup>1</sup> | Peptide Sequence | GI#      | Accession#  | peptide start | peptide end |
|---------------|-----------|--------------------|-----------------------|------------------|----------|-------------|---------------|-------------|
| EVM001        | 124       | 8.05               | E                     | VKDGFKYIDGSVSEG  | 22164608 | NP_671519.1 | 216           | 230         |
| EVM015        | 186       | 14.59              | E                     | VKEENYSSPYIEHPL  | 22164622 | NP_671533.1 | 126           | 140         |
| EVM057        | 401       | 3.12               | IE                    | PYDTYAGSYASNGIL  | 22164662 | NP_671575.1 | 551           | 565         |
| EVM060        | 425       | 8.89               | N/A                   | VFELPVSPLAYFFK   | 22164665 | NP_671578.1 | 106           | 120         |
| EVM061        | 434       | 7.22               | E/L                   | NKYPFSKIPLASLTP  | 22164666 | NP_671579.1 | 151           | 165         |
| EVM080        | 543       | 14.32              | E                     | FQVFNESINYTPVD   | 22164685 | NP_671598.1 | 61            | 75          |
| EVM085        | 588       | 1.54               | E/L                   | KRYPGVMYAFTTPLI  | 22164690 | NP_671603.1 | 266           | 280         |
| EVM086        | 598       | 2.97               | N/A                   | TCVEQKIVAPTPSVE  | 22164691 | NP_671604.1 | 621           | 635         |
| EVM090        | 627       | 1.61               | E/L                   | FRYMSSEPIIFGESS  | 22164695 | NP_671608.1 | 406           | 420         |
| EVM102        | 700       | 0.56               | L                     | FTPKIFFRPTTITAN  | 22164707 | NP_671620.1 | 481           | 495         |
| EVM106        | 709       | 7.88               | L                     | ELDKIYSPSNHHILL  | 22164711 | NP_671624.1 | 186           | 200         |
| EVM106        | 711       | 7.72               | L                     | FIYRKPETNYIHPI   | 22164711 | NP_671624.1 | 221           | 235         |
| EVM106        | 720       | 8.55               | L                     | PLSVFNPGARNARLM  | 22164711 | NP_671624.1 | 546           | 560         |
| EVM107        | 724       | 4.26               | L                     | RRPIQLPQPTIHITP  | 22164712 | NP_671625.1 | 66            | 80          |
| H14B          | 988       | 11.96              | -                     | LEFNTPFVFIIRHDI  | 22164761 | NP_671541.1 | 346           | 360         |
| serpin_C7R    | 25        | 6.11               | -                     | MKGENVFISSASISS  | 22164596 | NP_671680.1 | 11            | 25          |
| serpin_C7R    | 31        | 8.30               | -                     | MMSMYGEPFNHASVK  | 22164596 | NP_671680.1 | 166           | 180         |
| serpin_C7R    | 35        | 6.22               | -                     | EEYTEAAAATCALVS  | 22164596 | NP_671680.1 | 291           | 305         |

1 as assessed for VACV in [39]
